# Supplementary material
Source: PubMed Central journal article supplement (PMC10501741)
Supplement: NIHMS1899371-supplement-Supplm_Material.pdf [file NIHMS1899371-supplement-Supplm_Material.pdf]

**Study:** AWARE 24-month Follow-up Qualitative Component

## **Participant Interview (STABLE)**

PLEASE NOTE THAT INSTRUCTIONS IN CAPS OR ITALICS ARE FOR INTERVIEWER ONLY.

**Date** \_\_\_\_\_

**Interviewer Name** \_\_\_\_\_

**Participant Initials** \_\_\_\_\_

### **Demographic Questions:**

**Age:** \_\_\_\_\_

**Sex:** Male; Female; Other \_\_\_\_\_

**Ethnicity:** Asian; Black; Hispanic; White; Other \_\_\_\_\_

### **INTRODUCTION AND VERBAL CONSENT (see separate document)**

Do you have any questions before we begin? [*Answer any questions and then proceed to interview*].

### **INTERVIEW QUESTIONS**

#### **Questions about where you live**

On the survey you recently completed, you indicated that you've been living [*recount their responses to item 70*]. I am curious about your housing situation, and I am going to ask you a few questions about it.

1. Describe for me your housing journey from where you were living two years ago when we first talked to you to where you're living now.
  - a. *PROBES: Try to get a timeline that captures how much time they spent unhoused vs. housed.*
2. How long have you lived where you're at now?
3. How do you feel about your current house/apartment?
  - a. *PROBES: Do you have everything you need to function and feel comfortable? For example, furnishings, kitchen utensils, other daily living items.*
4. How do you feel about your roommates or neighbors?
5. What do you like most about where you live? Why?

- a. *PROBES: How do you feel about the location of your house/apartment? What do you like about how it looks inside? How safe do you feel living here? Tell me about any rules your landlord imposes (e.g., pets, visitors)? How do you feel about these rules?*
- 6. What do you like least about where you live? Why?
  - a. *PROBES: Same probes as in Question 5. It is likely they will answer with both likes and dislikes in response to Question 5.*

**Questions about getting housed**

- 7. Please walk me through how you got to live in your current house/apartment.
  - a. *PROBES: How did you find this place? How easy was it to find this place? How long did it take you to find this place? What did you have to do to get this place?*
  - b. *[IF THEY BRING UP DISCRIMINATION] Tell me more about the discrimination that you have perceived or experienced.*
- 8. What role did alcohol or drug use play in your ability to get or stay housed, if any?
- 9. How did you feel about the process of getting housing?
- 10. What would make the process better?

**Questions about impact on quality of life**

I am interested in how your quality of life has been affected by **having a regular place to stay**. I'm going to be asking about different aspects of quality of life.

| <b>Dimensions of Quality of Life</b> | <b>Pre-Housing</b>                                                                                                                                                                                                                                      | <b>Currently</b>                                                                                                                     |
|--------------------------------------|---------------------------------------------------------------------------------------------------------------------------------------------------------------------------------------------------------------------------------------------------------|--------------------------------------------------------------------------------------------------------------------------------------|
| <b>Physical health</b>               | <ul style="list-style-type: none"> <li>○ When you did not have a regular place to stay, how did you typically take care of your physical health?<br/>By physical health I mean keeping in shape, staying well, or resting when you are sick.</li> </ul> | <ul style="list-style-type: none"> <li>○ How has your physical health changed since you have had a regular place to stay?</li> </ul> |
| <b>Mental health</b>                 | <ul style="list-style-type: none"> <li>○ When you did not have a regular place to stay, how did you typically take care of your mental health?<br/>By mental health issues I mean feeling anxious or depressed.</li> </ul>                              | <ul style="list-style-type: none"> <li>○ How has your mental health changed since you have had a regular place to stay?</li> </ul>   |

|                                 |                                                                                                                                                                                                                                                                                                                                                                  |                                                                                                                                                                                                                                                                                                                                                                                                                                                                                |
|---------------------------------|------------------------------------------------------------------------------------------------------------------------------------------------------------------------------------------------------------------------------------------------------------------------------------------------------------------------------------------------------------------|--------------------------------------------------------------------------------------------------------------------------------------------------------------------------------------------------------------------------------------------------------------------------------------------------------------------------------------------------------------------------------------------------------------------------------------------------------------------------------|
| <p><b>Substance Use</b></p>     | <ul style="list-style-type: none"> <li>○ When you did not have a regular place to stay, did you use any substances?<br/>PROBE: How often? How much?</li> </ul>                                                                                                                                                                                                   | <ul style="list-style-type: none"> <li>○ Can you tell me about your current use of alcohol, cannabis, and other drugs? PROBE: How often? How much?</li> <li>○ How has your substance use changed since you have had a regular place to stay?</li> </ul>                                                                                                                                                                                                                        |
| <p><b>Medications</b></p>       | <ul style="list-style-type: none"> <li>○ Were you taking any medications when you did not have a regular place to stay?</li> <li>○ [IF YES] How did you manage that?</li> </ul>                                                                                                                                                                                  | <ul style="list-style-type: none"> <li>○ Are you taking any medications now?</li> <li>○ [IF YES] How has having a regular place to stay affected your ability to take your medications as prescribed?</li> </ul>                                                                                                                                                                                                                                                               |
| <p><b>Social well-being</b></p> | <ul style="list-style-type: none"> <li>○ When you did not have a regular place to stay, how did this affect your social life?</li> </ul> <p><i>PROBES:</i></p> <ul style="list-style-type: none"> <li>○ With friends?</li> <li>○ With romantic partners?</li> <li>○ With your family?</li> <li>○ Were you in touch with your family during that time?</li> </ul> | <ul style="list-style-type: none"> <li>○ Tell me about how having a regular place to stay has affected your social life?</li> </ul> <p><i>PROBES:</i></p> <ul style="list-style-type: none"> <li>○ With old friends from your time being without a regular place to stay?</li> <li>○ With new friends?</li> <li>○ With romantic partners?</li> <li>○ With your family?</li> <li>○ Have you started a family of your own since you have had a regular place to stay?</li> </ul> |
| <p><b>Personal security</b></p> | <ul style="list-style-type: none"> <li>○ When you did not have a regular place to stay, tell me about your feelings of physical safety. By safe I mean the feeling that others are</li> </ul>                                                                                                                                                                    | <ul style="list-style-type: none"> <li>○ How safe do you feel now?</li> <li>○ What threats do you still worry about?</li> </ul>                                                                                                                                                                                                                                                                                                                                                |

|                                                     |                                                                                                                                                                                                                                                                                                                          |                                                                                                                                                                                                                                                                                                    |
|-----------------------------------------------------|--------------------------------------------------------------------------------------------------------------------------------------------------------------------------------------------------------------------------------------------------------------------------------------------------------------------------|----------------------------------------------------------------------------------------------------------------------------------------------------------------------------------------------------------------------------------------------------------------------------------------------------|
|                                                     | <p>not going to harm you or steal from you.</p> <ul style="list-style-type: none"> <li>○ [IF YES] What kind of threats to safety did you worry about, e.g., physical assaults, sexual assaults, theft?</li> </ul>                                                                                                        |                                                                                                                                                                                                                                                                                                    |
| <b>Food</b>                                         | <ul style="list-style-type: none"> <li>○ When you did not have a regular place to stay, tell me about your eating habits. Where did you typically get food? Did you feel like you were able to get your nutritional needs met?</li> </ul>                                                                                | <ul style="list-style-type: none"> <li>○ How have your eating habits changed since you have had a regular place to stay?</li> <li>○ How often do you run out of food or money to buy food?</li> <li>○ If you were to run out of food, do you have access to food assistance?</li> </ul>            |
| <b>Economic well-being</b>                          | <ul style="list-style-type: none"> <li>○ When you did not have a regular place to stay, tell me about your main source(s) of income. Where did you get money to do the things you needed and wanted to do?</li> <li>○ When you did not have a regular place to stay, tell me about your employment situation.</li> </ul> | <ul style="list-style-type: none"> <li>○ How has your income changed since you have had a regular place to stay?</li> <li>○ Have you changed jobs or started a new job since you have had a regular place to stay?</li> <li>○ [IF YES] How does your apartment help you keep your job?</li> </ul>  |
| <b>Personal pursuits (e.g., hobbies, education)</b> | <ul style="list-style-type: none"> <li>○ Were you engaging in any other activities at that time, e.g., hobbies, education?</li> </ul>                                                                                                                                                                                    | <ul style="list-style-type: none"> <li>○ Have you started new educational opportunities since you have had a regular place to stay?</li> <li>○ [IF YES] How does your apartment help you pursue your education?</li> <li>○ Are you engaging in any activities that you find fulfilling?</li> </ul> |

|                                           |                                                                                                                                                                              |                                                                                                                    |
|-------------------------------------------|------------------------------------------------------------------------------------------------------------------------------------------------------------------------------|--------------------------------------------------------------------------------------------------------------------|
| <b>Law Enforcement / Criminal Justice</b> | <ul style="list-style-type: none"> <li>○ Tell us about your experiences with police or the criminal justice system when you did not have a regular place to stay.</li> </ul> | <ul style="list-style-type: none"> <li>○ How has this changed since you've had a regular place to stay?</li> </ul> |
|-------------------------------------------|------------------------------------------------------------------------------------------------------------------------------------------------------------------------------|--------------------------------------------------------------------------------------------------------------------|

### Questions about services

I want to ask you a few questions about services you are currently receiving. By services, I mean help or support with your physical health, mental health, substance use, help getting food and eating healthy, any legal assistance, help finding a job, and so on.

11. What services have you been using for any of the things we've just talked about?
  - a. *PROBES: Have you been going to the doctor for your physical health? What about for your mental health? Have you been attending life skills or cooking classes? Have you been receiving any help with traveling out and about? Have you been benefitting from food banks or meal programs? Have you received help with finding a job?*
12. Are you still eligible for "youth" homeless services? If so, do you now use "adult" homeless services? Why/why not?
13. How have these services helped you keep your housing, if at all?
14. What has your experience been with these services?
  - a. *PROBES: How easy was it to get the services? What got in the way of you getting these services? Who helped you get these services?*
15. How would you make these services better?
16. Are there any services you need that you are not currently receiving?
  - a. *PROBES: If so, what is preventing you from receiving those services? Are you no longer eligible for drop-in center support?*

### Questions about suggestions for improvement

How would you improve the services available to people your age who do not have a regular place to stay?

- a. *PROBE for services captured in Q58 on the survey: help with finishing education; help finding a job; financial and legal assistance; HIV/STD prevention; mental health counseling.*

### Questions about COVID-19 vaccine

There's one last thing I want to ask you about, on a different topic.

1. Have you gotten the COVID-19 vaccine? (no; one dose; two doses)
2. IF NO: Why haven't you gotten the COVID-19 vaccine? *PROBES:*
  - a. *Haven't gotten around to it*
  - b. *Lack of access (don't know where to get it; too difficult/hassle)*
  - c. *COVID isn't a serious threat*
  - d. *Concern about vaccine side effects*
  - e. *Don't trust that the vaccine (e.g., safety; effectiveness)*
  - f. *Don't trust institutions associated with the vaccine (e.g., government; CDC; science)*
  - g. *Other reason(s)*
3. IF YES: What motivated you to get vaccinated?

[IF THEY CITE MISINFORMATION AND MISTRUST AS REASONS WHY THEY DID NOT GET VACCINATED, then ask: I know many people share your concerns about the COVID-19 vaccine. Is it ok if we text you a link to more information about the vaccine?]

THANK YOU VERY MUCH FOR YOUR TIME AND EVERYTHING YOU HAVE SHARED WITH US!

**Study:** AWARE 24-month Follow-up Qualitative Component

## **Participant Interview (NOT STABLE)**

PLEASE NOTE THAT INSTRUCTIONS IN CAPS OR ITALICS ARE FOR INTERVIEWER ONLY.

**Date** \_\_\_\_\_

**Interviewer Name** \_\_\_\_\_

**Participant Initials** \_\_\_\_\_

### **Demographic Questions:**

**Age:** \_\_\_\_\_

**Sex:** Male; Female; Other \_\_\_\_\_

**Ethnicity:** Asian; Black; Hispanic; White; Other \_\_\_\_\_

### **INTRODUCTION AND VERBAL CONSENT (see separate document)**

Do you have any questions before we begin? [*Answer any questions and then proceed to interview*].

### **INTERVIEW QUESTIONS**

#### **Questions about where you live**

On the survey you recently completed, you indicated that you've been living [*recount their responses to item 70*]. I am curious about your housing situation and am going to ask you a few questions about it.

1. Describe for me your housing journey from where you were living two years ago when we first talked to you and where you're living now.
  - a. *PROBES: Have you been in any temporary housing before your current situation? [IF YES] How long did you spend in temporary housing? What caused you to move out of temporary housing? Try to get a timeline that captures how much time they spent during each period of housing before becoming unhoused again.*
2. How long have you lived where you're at now?
3. Do you live with or near other people?
  - a. *[IF YES] How do you feel about them?*
4. What do you like most about where you live? Why?

- a. *PROBES: How do you feel about where you live? How safe do you feel living here? Tell me about any rules in place where you live? How do you feel about these rules?*
- 5. What do you like least about where you live? Why?
  - a. *PROBES: Same probes as in Question 3. It is likely they will answer with both likes and dislikes in response to Question 3.*

**Questions about getting housed**

- 6. Describe the main barriers you've experienced to being stably housed?
  - a. *PROBE: What has prevented you from getting housed?*
  - b. *PROBE: What has prevented you from staying housed?*
  - c. *PROBE: What role has alcohol or drug use played in getting or staying housed?*
  - d. *[IF THEY BRING UP DISCRIMINATION] Tell me more about the discrimination that you have perceived or experienced.*
- 7. What would help you get and keep stable housing?

**Questions about impact on quality of life**

I am interested in how your quality of life has been affected by **where you've lived** over the last year. I'm going to be asking about different aspects of quality of life.

| <b>Dimensions of Quality of Life</b> |                                                                                                                                                                                                                                                                                                     |
|--------------------------------------|-----------------------------------------------------------------------------------------------------------------------------------------------------------------------------------------------------------------------------------------------------------------------------------------------------|
| <b>Physical health</b>               | <ul style="list-style-type: none"> <li>○ How has your physical health changed over the last year? By physical health I mean keeping in shape, staying well, or resting when you are sick.</li> <li>○ How have you typically been taking care of your physical health over the last year?</li> </ul> |
| <b>Mental health</b>                 | <ul style="list-style-type: none"> <li>○ How has your mental health changed over the last year? By mental health issues I mean feeling anxious or depressed.</li> <li>○ How have you typically been taking care of your mental health over the last year?</li> </ul>                                |
| <b>Substance Use</b>                 | <ul style="list-style-type: none"> <li>○ Can you tell me about your current use of alcohol, cannabis, and other drugs? <i>PROBE: How often? How much?</i></li> <li>○ How has your substance use changed over the last year?</li> </ul>                                                              |
| <b>Medications</b>                   | <ul style="list-style-type: none"> <li>○ Have you been taking any medications over the last year? How have you been managing that? Have you been taking meds regularly or occasionally?</li> </ul>                                                                                                  |
| <b>Social well-being</b>             | <ul style="list-style-type: none"> <li>○ How has your social life changed over the last year?<br/><i>PROBES:</i><br/>Relationships with friends?</li> </ul>                                                                                                                                         |



|                                                     |                                                                                                                                                                                                                                                                                                                                       |
|-----------------------------------------------------|---------------------------------------------------------------------------------------------------------------------------------------------------------------------------------------------------------------------------------------------------------------------------------------------------------------------------------------|
|                                                     | <p>Relationships with romantic partners? Have you had any partners in the past year? How has your relationship with romantic partners changed over the last year?</p> <ul style="list-style-type: none"> <li>○ Relationships with family?</li> <li>○ Have you started a family of your own in the last year? Why? Why not?</li> </ul> |
| <b>Personal security</b>                            | <ul style="list-style-type: none"> <li>○ How safe have you been feeling over the last year? By safe I mean the feeling that others are not going to harm you or steal from you.</li> <li>○ What threats have you been worried about over the last year?</li> </ul>                                                                    |
| <b>Food</b>                                         | <ul style="list-style-type: none"> <li>○ Tell me about your eating habits. Where have you been typically getting food?</li> <li>○ How often have you run out of food or money to buy food over the last year?</li> <li>○ If you ran out of food, did you have access to food assistance over the last year?</li> </ul>                |
| <b>Economic well-being</b>                          | <ul style="list-style-type: none"> <li>○ How has your income changed during the last year?</li> <li>○ Have you had enough money to buy the things you needed or wanted over the last year?</li> <li>○ Have you changed jobs or started a new job in the last year? Tell me about it.</li> </ul>                                       |
| <b>Personal pursuits (e.g., education, hobbies)</b> | <ul style="list-style-type: none"> <li>○ Over the last year, have you engaged in any other activities, e.g., education, hobbies that you find fulfilling?</li> </ul>                                                                                                                                                                  |
| <b>Law Enforcement/ Criminal Justice</b>            | <ul style="list-style-type: none"> <li>○ Tell me about your experiences with police or the criminal justice system over the last year.</li> </ul>                                                                                                                                                                                     |

### Questions about services

I want to ask you a few questions about services you are currently receiving. By services, I mean help or support your physical health, mental health, substance use, help getting food and eating healthy, any legal assistance, help finding a job, and so on.

8. What services have you been using for any of the things we've just talked about?
  - a. *PROBES: Have you been going to the doctor for your physical health? What about for your mental health? Have you been attending life skills or cooking classes? Have you been receiving any help with traveling out and about? Have you been benefitting from food banks or meal programs? Have you received help with finding a job?*
9. Are you still eligible for "youth" homeless services? If so, do you now use "adult" homeless services? Why/why not?
10. What has your experience been with these services?

- a. *PROBES: How easy was it to get the services? What got in the way of you getting these services? Who helped you get these services?*
- 11. What would make these services better?
- 12. Are there any services you need that you are not currently receiving?
  - a. *PROBES: If so, what is preventing you from receiving those services? Are you no longer eligible for drop-in center support?*

### **Questions about suggestions for improvement**

How would you improve the services available for people your age who do not have a regular place to stay?

- a. *PROBE for services captured in Q58 on the survey: help with finishing education; help finding a job; financial and legal assistance; HIV/STD prevention; mental health counseling.*

### **Questions about COVID-19 vaccine**

There's one last thing I want to ask you about, on a different topic.

1. Have you gotten the COVID-19 vaccine? (no; one dose; two doses)
2. IF NO: Why haven't you gotten the COVID-19 vaccine? *PROBES:*
  - a. *Haven't gotten around to it*
  - b. *Lack of access (don't know where to get it; too difficult/hassle)*
  - c. *COVID isn't a serious threat*
  - d. *Concern about vaccine side effects*
  - e. *Don't trust that the vaccine (e.g., safety; effectiveness)*
  - f. *Don't trust institutions associated with the vaccine (e.g., government; CDC; science)*
  - g. *Other reason(s)*
3. IF YES: What motivated you to get vaccinated?

[IF THEY CITE MISINFORMATION AND MISTRUST AS REASONS WHY THEY DID NOT GET VACCINATED, then ask: I know many people share your concerns about the COVID-19 vaccine. Is it ok if we text you a link to more information about the vaccine?]

THANK YOU VERY MUCH FOR YOUR TIME AND EVERYTHING YOU HAVE SHARED WITH US!
